# Supplementary material for: Risk Stratification for ECMO Requirement in COVID-19 ICU Patients Using Quantitative Imaging Features in CT Scans on Admission
Source: MDPI journal article supplement (doi:10.3390/diagnostics11061029), 2021-06-03
Supplement: s1 [file s1]

**Risk stratification for ECMO requirement in COVID-19 ICU patients using  
quantitative imaging features in CT scans on admission**

E. Gresser<sup>1</sup>, M.D., J. Reich<sup>1</sup>, B. O. Sabel<sup>1</sup>, M.D., W. G. Kunz<sup>1</sup>, M.D., M. P. Fabritius<sup>1</sup>, M.D., J. Rübenthaler, M.D., M. Ingrisch, PhD, Wassilowsky<sup>2</sup>, M.D., M. Irlbeck<sup>2</sup>, M.D., J. Ricke<sup>1</sup>, M.D., D. Puhr-Westerheide<sup>1</sup>, M.D.

<sup>1</sup>**Department of Radiology, University Hospital, LMU Munich, Munich, Germany**

<sup>2</sup>**Department of Anesthesiology, University Hospital, LMU Munich, Munich, Germany**

**Supplemental Material**

**Corresponding author:**

Eva Gresser, M.D.

Department of Radiology, University Hospital Munich, LMU Munich, Germany

Tel.: +49-89-4400-73620

Fax.: +49-89-4400-78832

Email: [eva.gresser@med.uni-muenchen.de](mailto:eva.gresser@med.uni-muenchen.de)

**Supplemental Table S1. Parameters associated with In-Hospital Mortality for COVID-19 ICU-patients**

| Independent variables | In-Hospital Mortality |              | p value       |
|-----------------------|-----------------------|--------------|---------------|
|                       | Odds Ratio            | CI           |               |
| Age                   | 1.080                 | 0.986-1.183  | 0.097         |
| Sex                   | 0.913                 | 0.112-7.408  | 0.932         |
| BMI                   | 0.809                 | 0.674-0.970  | <b>0.022*</b> |
| SOFA on Admission     | 0.886                 | 0.667-1.178  | 0.406         |
| Mean SOFA score       | 2.091                 | 1.263-3.464  | <b>0.004*</b> |
| Maximum SOFA score    | 1.249                 | 0.771-2.024  | 0.366         |
| ECMO Therapy          | 5.811                 | 0.452-74.744 | 0.177         |

**Supplemental Table S1.** Parameters associated with In-Hospital Mortality for COVID-19 ICU patients. Binary logistic regression analysis. ECMO, extracorporeal membrane oxygenation; COVID-19, coronavirus disease 2019; ICU, intensive care unit; CI, confidence interval; BMI, body mass index; SOFA, sequential organ failure assessment; CT, computed tomography; 8 patients not included in regression analysis due to missing values.

**Supplemental Table S2. Predictors for ECMO Therapy for COVID-19 ICU-patients (VV-ECMO Patients only)**

| Independent variables                   | ECMO Therapy |             |               |
|-----------------------------------------|--------------|-------------|---------------|
|                                         | Odds Ratio   | CI          | p value       |
| Age                                     | 1.011        | 0.926-1.103 | 0.812         |
| Sex                                     | 0.451        | 0.052-3.910 | 0.470         |
| BMI                                     | 1.110        | 0.958-1.286 | 0.166         |
| SOFA on Admission                       | 1.309        | 1.054-1.626 | <b>0.015*</b> |
| Lactate on Admission                    | 1.136        | 0.597-2.162 | 0.697         |
| CT Lung Involvement (%)<br>on Admission | 1.053        | 1.006-1.101 | <b>0.023*</b> |

**Supplemental Table S2.** Predictors for ECMO therapy (VV-ECMO patients only, n=12) for COVID-19 ICU patients. Results from binary logistic regression with adjustment for multiple covariates. ECMO, extracorporeal membrane oxygenation; COVID-19, coronavirus disease 2019; ICU, intensive care unit; CI, confidence interval; BMI, body mass index; SOFA, sequential organ failure assessment; CT, computed tomography; 18 patients not included in regression analysis due to missing values.

**Table S3. Predictors for ECMO Therapy for COVID-19 ICU-patients**

| Independent variables                   | ECMO Therapy |               |               |
|-----------------------------------------|--------------|---------------|---------------|
|                                         | Odds Ratio   | CI            | p value       |
| Age                                     | 0.993        | 0.911-1.084   | 0.882         |
| Hypertension                            | 1.863        | 0.319-10.895  | 0.490         |
| Diabetes                                | 0.362        | 0.057-2.281   | 0.279         |
| Renal Failure                           | 9.467        | 0.600-149.356 | 0.110         |
| Heart Disease                           | 0.663        | 0.068-5.915   | 0.688         |
| Pulmonary Disease                       | 2.242        | 0.305-16.491  | 0.428         |
| SOFA on Admission                       | 1.376        | 1.080-1.754   | <b>0.010*</b> |
| CT Lung Involvement (%)<br>on Admission | 1.070        | 1.023-1,119   | <b>0.003*</b> |

**Supplemental Table S3.** Comorbidity model for the prediction of ECMO therapy for COVID-19 ICU patients. Results from binary logistic regression with adjustment for multiple covariates. ECMO, extracorporeal membrane oxygenation; COVID-19, coronavirus disease 2019; ICU, intensive care unit; CI, confidence interval; SOFA, sequential organ failure assessment; CT, computed tomography; 18 patients not included in regression analysis due to missing values.
